# Supplementary material for: Impact of Transcription Units rearrangement on the evolution of the regulatory network of gamma-proteobacteria
Source: PubMed Central journal article supplement (PMC2329645; doi:10.1186/1471-2164-9-128), 2008-03-17
Supplement: 1471-2164-9-128-S4.pdf [file 1471-2164-9-128-S4.pdf]

**T1: Distribution of the SOS (maximum value, mean value, and standard deviation) for each regulon and globally within the network**

| <b>Regulon</b> | <b>Maximum SOS</b> | <b>Mean SOS</b> | <b>SOS SD</b> |
|----------------|--------------------|-----------------|---------------|
| <b>Ada</b>     | 0.2                | 0.1             | 0.05          |
| <b>AppY</b>    | 0.23               | 0.14            | 0.05          |
| <b>AraC</b>    | 0.32               | 0.17            | 0.1           |
| <b>ArcA</b>    | 0.25               | 0.12            | 0.08          |
| <b>ArgR</b>    | 0.69               | 0.17            | 0.2           |
| <b>AsnC</b>    | 0.23               | 0.23            | 0             |
| <b>BetI</b>    | 0.18               | 0.12            | 0.06          |
| <b>BirA</b>    | 0.18               | 0.06            | 0.05          |
| <b>CadC</b>    | 1                  | 0.33            | 0.26          |
| <b>CaiF</b>    | 0.76               | 0.34            | 0.3           |
| <b>CpxR</b>    | 0.04               | 0.03            | 0.02          |
| <b>CRP</b>     | 0.54               | 0.11            | 0.09          |
| <b>CsgD</b>    | 0.44               | 0.44            | 0             |
| <b>CspA</b>    | 0.2                | 0.08            | 0.07          |
| <b>CysB</b>    | 0.04               | 0.01            | 0.02          |
| <b>CytR</b>    | 0.46               | 0.29            | 0.11          |
| <b>DcuR</b>    | 0.07               | 0.07            | 0             |
| <b>DeoR</b>    | 0.09               | 0.09            | 0             |
| <b>DnaA</b>    | 0.29               | 0.28            | 0.02          |
| <b>DsdC</b>    | 0.18               | 0.09            | 0.09          |
| <b>EbgR</b>    | 0.08               | 0.08            | 0             |
| <b>EnvY</b>    | 0.31               | 0.31            | 0             |
| <b>ExuR</b>    | 0.06               | 0.06            | 0             |
| <b>FabR</b>    | 0.4                | 0.16            | 0.16          |
| <b>FadR</b>    | 0.39               | 0.15            | 0.1           |
| <b>FarR</b>    | 0.38               | 0.22            | 0.09          |
| <b>FhlA</b>    | 0.05               | 0.05            | 0             |
| <b>FIS</b>     | 0.14               | 0.08            | 0.05          |
| <b>FlhD</b>    | 0.25               | 0.25            | 0             |
| <b>FNR</b>     | 0.5                | 0.1             | 0.1           |
| <b>FruR</b>    | 0.69               | 0.28            | 0.18          |
| <b>FucR</b>    | 0.22               | 0.18            | 0.04          |
| <b>Fur</b>     | 0.83               | 0.15            | 0.14          |
| <b>GadW</b>    | 0.7                | 0.4             | 0.09          |
| <b>GadX</b>    | 0.48               | 0.24            | 0.24          |
| <b>GalR</b>    | 0.22               | 0.22            | 0             |
| <b>GalS</b>    | 0.47               | 0.36            | 0.11          |
| <b>GcvA</b>    | 0.6                | 0.26            | 0.17          |
| <b>GlcC</b>    | 0.75               | 0.7             | 0.06          |
| <b>GlpR</b>    | 0.35               | 0.13            | 0.1           |
| <b>GntR</b>    | 0.23               | 0.18            | 0.05          |
| <b>IclR</b>    | 0.13               | 0.13            | 0             |

|               |      |      |      |
|---------------|------|------|------|
| <b>IlyY</b>   | 0.51 | 0.51 | 0    |
| <b>KdpE</b>   | 0.06 | 0.06 | 0    |
| <b>LexA</b>   | 0.59 | 0.19 | 0.17 |
| <b>LrhA</b>   | 0.18 | 0.18 | 0    |
| <b>Lrp</b>    | 0.28 | 0.18 | 0.08 |
| <b>LysR</b>   | 0.83 | 0.31 | 0.19 |
| <b>MarA</b>   | 0.81 | 0.81 | 0    |
| <b>MarR</b>   | 0.41 | 0.41 | 0    |
| <b>MelR</b>   | 0.19 | 0.19 | 0    |
| <b>MetJ</b>   | 0.84 | 0.32 | 0.27 |
| <b>MetR</b>   | 0.04 | 0.01 | 0.02 |
| <b>MhpR</b>   | 0.32 | 0.25 | 0.08 |
| <b>Mlc</b>    | 0.67 | 0.4  | 0.17 |
| <b>ModE</b>   | 0.3  | 0.15 | 0.07 |
| <b>Nac</b>    | 0.91 | 0.17 | 0.18 |
| <b>NadR</b>   | 0.22 | 0.12 | 0.09 |
| <b>NagC</b>   | 0.24 | 0.19 | 0.04 |
| <b>NarL</b>   | 0.55 | 0.09 | 0.12 |
| <b>NarP</b>   | 0.15 | 0.15 | 0    |
| <b>NhaR</b>   | 0.12 | 0.06 | 0.04 |
| <b>NtrC</b>   | 0.71 | 0.22 | 0.1  |
| <b>OmpR</b>   | 0.13 | 0.12 | 0.02 |
| <b>OxyR</b>   | 0.04 | 0.04 | 0    |
| <b>PdhR</b>   | 0.88 | 0.88 | 0    |
| <b>PhoB</b>   | 0.83 | 0.2  | 0.22 |
| <b>PhoP</b>   | 0.25 | 0.13 | 0.06 |
| <b>PurR</b>   | 0.71 | 0.27 | 0.18 |
| <b>RcsB</b>   | 0.11 | 0.11 | 0    |
| <b>RhaR</b>   | 0.23 | 0.23 | 0    |
| <b>RhaS</b>   | 0.08 | 0.08 | 0    |
| <b>Rob</b>    | 0.12 | 0.07 | 0.03 |
| <b>RtcR</b>   | 0.11 | 0.11 | 0    |
| <b>SlyA</b>   | 0.11 | 0.10 | 0.01 |
| <b>SoxR</b>   | 0.12 | 0.12 | 0    |
| <b>SoxS</b>   | 0.11 | 0.07 | 0.02 |
| <b>TorR</b>   | 0.55 | 0.39 | 0.18 |
| <b>TreR</b>   | 0.68 | 0.68 | 0    |
| <b>TrpR</b>   | 0.22 | 0.22 | 0    |
| <b>TyrR</b>   | 0.06 | 0.03 | 0.01 |
| <b>UhpA</b>   | 0.13 | 0.13 | 0    |
| <b>XapR</b>   | 0.2  | 0.2  | 0    |
| <b>XylR</b>   | 0.56 | 0.56 | 0    |
| <b>YiaJ</b>   | 0.31 | 0.31 | 0    |
| <b>Global</b> | 1    | 0.21 | 0.07 |
