# Supplementary material for: Impact of Transcription Units rearrangement on the evolution of the regulatory network of gamma-proteobacteria
Source: PubMed Central journal article supplement (PMC2329645; doi:10.1186/1471-2164-9-128), 2008-03-17
Supplement: 1471-2164-9-128-S9.pdf [file 1471-2164-9-128-S9.pdf]

## R2: Calculation of the SOS of a regulatory link

Fraction of the genes of each organism with orthologs in *E. coli*. The table shows only organisms where we detected orthologs of FruR and the genes of the *fruB-fruK-fruA* TU.

|                                                |      |
|------------------------------------------------|------|
| <i>Erwinia carotovora atroseptica</i> SCRI1043 | 0.93 |
| <i>Shigella flexneri</i> 2a 2457T              | 0.78 |
| <i>Shigella flexneri</i> 2a                    | 0.77 |
| <i>Haemophilus influenzae</i>                  | 0.71 |
| <i>Escherichia coli</i> O157H7 EDL933          | 0.70 |
| <i>Escherichia coli</i> CFT073                 | 0.67 |
| <i>Salmonella typhimurium</i> LT2              | 0.70 |
| <i>Photobacterium profundum</i> SS9            | 0.68 |
| <i>Salmonella typhi</i>                        | 0.68 |
| <i>Vibrio cholerae</i>                         | 0.62 |
| <i>Pseudomonas syringae</i>                    | 0.61 |
| <i>Vibrio parahaemolyticus</i>                 | 0.60 |
| <i>Vibrio vulnificus</i> CMCP6                 | 0.60 |
| <i>Yersinia pestis</i> KIM                     | 0.56 |
| <i>Yersinia pseudotuberculosis</i> IP32953     | 0.56 |
| <i>Photorhabdus luminescens</i>                | 0.42 |
| <i>Yersinia pestis</i> biovar Mediaevails      | 0.32 |
| <i>Pseudomonas putida</i>                      | 0.31 |
| <i>Pseudomonas aeruginosa</i>                  | 0.31 |

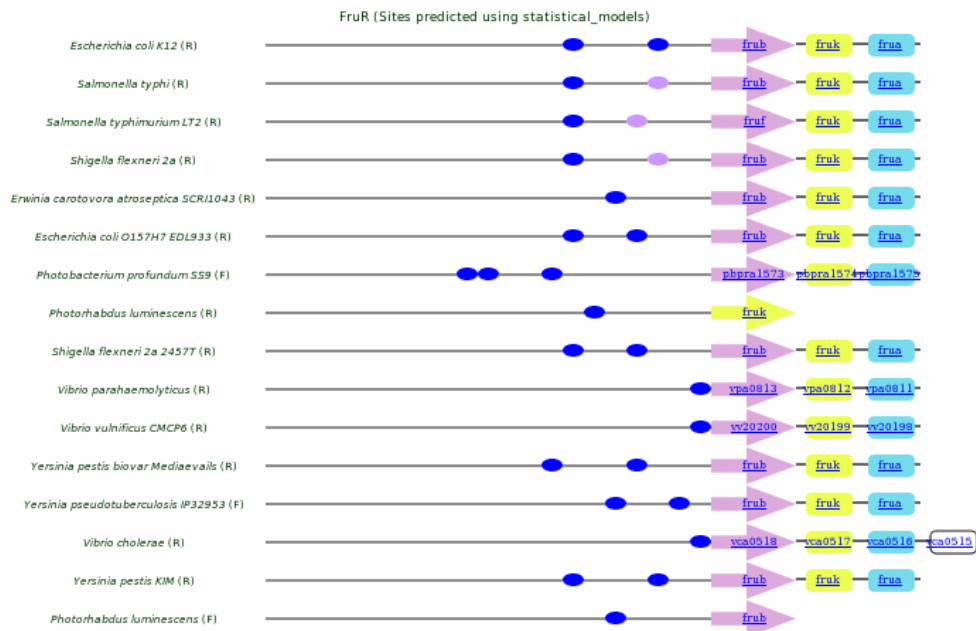

$$\text{SOS numerator} = (1 - 0.68) + (1 - 0.7) + (1 - 0.77) + (1 - 0.93) + (1 - 0.7) + (1 - 0.68) + (1 - 0.42) + (1 - 0.78) + (1 - 0.6) + (1 - 0.6) + (1 - 0.32) + (1 - 0.56) + (1 - 0.62) + (1 - 0.56) = 5.08$$

$$\begin{aligned} \text{SOS denominator} &= (1 - 0.31) + (1 - 0.77) + (1 - 0.61) + (1 - 0.67) + (1 - 0.7) + (1 - \\ &0.62) + (1 - 0.56) + (1 - 0.71) + (1 - 0.6) + (1 - 0.42) + (1 - 0.68) + (1 - 0.6) + (1 - 0.93) \\ &+ (1 - 0.68) + (1 - 0.56) + (1 - 0.7) + (1 - 0.78) + (1 - 0.32) + (1 - 0.31) = 7.47 \end{aligned}$$

$$\text{SOS} = 0.68$$
